# Supplementary material for: Host factor prioritization for pan-viral genetic perturbation screens using random intercept models and network propagation
Source: PubMed Central journal article supplement (PMC7034926; doi:10.1371/journal.pcbi.1007587), 2020-02-10
Supplement: pcbi.1007587.s002.pdf [file pcbi.1007587.s002.pdf]

**S1 Text. Normalisation methods.** We applied different combinations of normalization methods to get phenotypes that are comparable between the studies. In summary, we used the following methods for normalization:

- **Logarithm.** Compute the natural logarithm over every well-readout separately, such that a well's new readout  $y_{ij}$  is computed as  $y_{ij}^{\text{norm}} = \log(y_{ij})$ .
- **Background correction.** Subtract the mean/median of a row/column from every well of every plate separately.
- **Robust Z-scores.** Subtract by median and divide by median absolute deviation over every plate separately. The new readout is computed as  $y_{ij}^{\text{norm}} = \frac{y_{ij} - \text{med}(\mathbf{Y})}{\text{mad}(\mathbf{Y})}$ , where  $\text{med}(\mathbf{Y})$  is the median of plate readouts and  $\text{mad}(\mathbf{Y})$  is the median absolute deviation of plate readouts.
- **Loess.** Fits a locally-weighted polynomial regression model between well cell counts  $x_i$  and averaged well readout  $y_i$  separately on every plate using R's `lowess` function. The procedure estimates a new readout  $\hat{y}_i$  for every cell counts covariable  $x$ . The new normalized value is computed as  $y_i^{\text{norm}} = y_i - \hat{y}_i$ , i.e. the residual.
- **B-scores.** B-scores are computed using R's `medpolish` function on every plate separately. Input to `medpolish` is a matrix  $\mathbf{Y}$  where every element  $y_{ij}$  is the readout from the  $i$ -th row and  $j$ -th column from a plate. The new normalized value per row and column is computed as  $y_{ij}^{\text{norm}} = \frac{r_{ij}}{\text{mad}(\mathbf{R})}$ , where  $\mathbf{R}$  are the computed residuals for every well  $ij$  and  $\text{mad}(\mathbf{R})$  is the median absolute deviation of the residuals.

The implementation of the described methods can be found in Supplement S1 Code.
