# Supplementary material for: Host factor prioritization for pan-viral genetic perturbation screens using random intercept models and network propagation
Source: PubMed Central journal article supplement (PMC7034926; doi:10.1371/journal.pcbi.1007587), 2020-02-10
Supplement: pcbi.1007587.s003.pdf [file pcbi.1007587.s003.pdf]

**S2 Text. Stability analysis.** For validation of the stability of the rankings, we generate several different data sets that are parameterized by a noise variance  $\sigma^2$ , a virus count  $V$ , a replicate count  $R$ , a gene count  $G$  and screen count  $S$ . The steps to generate one data set for stability analysis are as follows”

1. Generate a random matrix of  $G$  columns and  $10 \cdot G$  rows. Then sample a random undirected scale free network  $\mathcal{G}$  of  $G$  nodes using the `barabasi.game` method from the `igraph`-package [1]. Next iterate over the set of edges from  $\mathcal{G}$  and set every edge weight to a random value following a Beta distribution with shapes  $\alpha = 2$  and  $\beta = 1$  (the shape parameters and the underlying distribution were chosen arbitrarily and other distributions with non-negative support are equally suited). From this adjacency matrix we compute the correlation matrix  $\Sigma$ .
2. Create standard normally distributed random vectors  $\boldsymbol{\nu} \sim \mathcal{N}_V(\mathbf{0}, \mathbf{I})$ ,  $\boldsymbol{\tau} \sim \mathcal{N}_S(\mathbf{0}, \mathbf{I})$  and  $\boldsymbol{\gamma} \sim \mathcal{N}_G(\mathbf{0}, \Sigma)$ .
3. Take all combinations  $\mathcal{D} = (\boldsymbol{\nu} \times \boldsymbol{\tau} \times \boldsymbol{\gamma})$ , i.e. take all combinations of elements  $\nu_j \in \boldsymbol{\nu}$ ,  $\tau_i \in \boldsymbol{\tau}$  and  $\gamma_k \in \boldsymbol{\gamma}$  in a  $(V \cdot S \cdot G \times 3)$ -dimensional matrix where every row is a vector  $(\nu_j, \tau_i, \gamma_k)$ .
4. Replicate each row from the data set  $\mathcal{D}$   $R$  times.
5. Add i.i.d. Gaussian noise  $\epsilon \sim \mathcal{N}(\mathbf{0}, \sigma^2 \mathbf{I})$  to all rows independently.

[1] Csardi G, Nepusz T, et al. The igraph software package for complex network research. *Inter-Journal, Complex Systems*. 2006;1695(5):1–9.
