# Supplementary material for: Host factor prioritization for pan-viral genetic perturbation screens using random intercept models and network propagation
Source: PubMed Central journal article supplement (PMC7034926; doi:10.1371/journal.pcbi.1007587), 2020-02-10
Supplement: pcbi.1007587.s004.pdf [file pcbi.1007587.s004.pdf]

**S3 Text. Analysis of predictive performance.** A simulated data set that validates predictive performance is parameterized by parameters for the number of replicates  $R$ , the number of viruses  $V$ , and a noise variance  $\sigma^2$ . We use a fixed gene count of  $G = 100$  and number of screening types  $S = 5$ . The steps to generate the simulated data are:

1. Generate a standard normally distributed random vector  $\gamma \sim \mathcal{N}_{90}(\mathbf{0}, \mathbf{I})$ . Create random vectors  $\gamma_h \sim \mathcal{N}_5(\mathbf{0.5}, \mathbf{I})$  and  $\gamma_l \sim \mathcal{N}_5(-\mathbf{0.5}, \mathbf{I})$  and append these vectors to  $\gamma$ . The two latter vectors represent the *true* hit genes, i.e., genes that have an impact on the life cycle of a group of pathogens. In the end the gene effect vector  $\gamma$  is a three-component mixture of Gaussians  $f(x) = 0.9 \cdot f_0(x) + 0.05 \cdot f_h(x) + 0.05 \cdot f_l(x)$  where  $f_h$  and  $f_l$  represent the distributions readouts for anti-viral genes and pro-viral genes, respectively and  $f_0$  is the distribution of readouts for null-genes, i.e., genes for which a transcript does not lead to changes in pathogen replication.
2. Create standard normal distributed random vectors  $\nu \sim \mathcal{N}_v(\mathbf{0}, \mathbf{I})$  and  $\tau \sim \mathcal{N}_s(\mathbf{0}, \mathbf{I})$ .
3. Take all combinations  $\mathcal{D} = (\nu \times \tau \times \gamma)$ , i.e. take all combinations of elements  $\nu_j \in \nu$ ,  $\tau_i \in \tau$  and  $\gamma_k \in \gamma$  in a  $(V \cdot S \cdot G \times 3)$ -dimensional matrix where every row is a vector  $(\nu_j, \tau_i, \gamma_k)$ .
4. Replicate each row from the data set  $\mathcal{D}$   $R$  times.
5. Add i.i.d. Gaussian noise  $\epsilon \sim \mathcal{N}(\mathbf{0}, \sigma^2 \mathbf{I})$  to all rows independently.
