# Supplementary material for: Host factor prioritization for pan-viral genetic perturbation screens using random intercept models and network propagation
Source: PubMed Central journal article supplement (PMC7034926; doi:10.1371/journal.pcbi.1007587), 2020-02-10
Supplement: pcbi.1007587.s007.pdf [file pcbi.1007587.s007.pdf]

**S6 Text. Details on estimation in linear mixed models.** We briefly explain the single steps of the model. We start with the general vector notation of the conditional Gaussian (multi-level) mixed model from Equation (1):

$$\mathbf{y}_{vgt} \mid \mathbf{u}_{vgt} \sim \mathcal{N}(\mathbf{x}_{vgt}\beta + \mathbf{Z}_{vgt}\mathbf{u}_{vgt}, \sigma^2\mathbf{I}),$$

where  $v = 1, \dots, V$  are the different viruses,  $g = 1, \dots, G$  are genes and  $t = 1, \dots, T$  are different screen types. The vector  $\mathbf{y}_{vgt}$  consists of all readouts that have been measured for virus  $v$ , gene  $g$  and screen type  $t$ ,  $\mathbf{u}_{vgt} = (\gamma_g, \delta_{vg}, \zeta_t, \xi_{vt})^T$  is a vector of random effects, and  $\mathbf{Z}_{vgt} = \mathbf{1}^{\text{len}(\mathbf{y}_{vgt}) \times 4}$  (because of 4 random intercept terms) is a random effects design matrix. The random effects  $\mathbf{u}$ , the fixed effect  $\beta$  and the noise variance  $\sigma^2$  are random variables or unknown constants of interest to be predicted, or estimated, respectively. When we collect the entire data set  $(\mathbf{x}_{vgt}, \mathbf{y}_{vgt})$ , i.e. all vectors for every combination of viruses, genes and screen types, we arrive at the general mixed model formulation which we need for estimation:

$$\mathbf{x} = \begin{pmatrix} \mathbf{x}_{1,1,1} \\ \vdots \\ \mathbf{x}_{v,g,t} \\ \vdots \\ \mathbf{x}_{V,G,T} \end{pmatrix}, \quad \mathbf{y} = \begin{pmatrix} \mathbf{y}_{1,1,1} \\ \vdots \\ \mathbf{y}_{v,g,t} \\ \vdots \\ \mathbf{y}_{V,G,T} \end{pmatrix}, \quad \mathbf{u} = \begin{pmatrix} \mathbf{u}_{1,1,1} \\ \vdots \\ \mathbf{u}_{v,g,t} \\ \vdots \\ \mathbf{u}_{V,G,T} \end{pmatrix}$$

It follows that when collecting all random effect design matrices  $\mathbf{Z}_{v,g,t}$  we get a block diagonal matrix:

$$\mathbf{Z} = \text{blockdiag}(\mathbf{Z}_{1,1,1}, \dots, \mathbf{Z}_{v,g,t}, \dots, \mathbf{Z}_{V,G,T})$$

Thus the general notation of the linear mixed model is

$$\mathbf{y} \mid \mathbf{u} \sim \mathcal{N}(\mathbf{x}\beta + \mathbf{Z}\mathbf{u}, \sigma^2\mathbf{I}),$$

where

$$\mathbf{u} \sim \mathcal{N}(\mathbf{0}, \mathbf{G}),$$

where  $\mathbf{G}$  is an unknown covariance matrix to be estimated. Recent research such as [1] introduced efficient approaches to estimation of parameters  $\beta$ ,  $\sigma^2$  and  $\mathbf{G}$  and prediction of  $\mathbf{u}$  which go beyond the scope of this paper. We recall here the general approach which for instance can be found in [2]: From the formalisation above we can integrate out the random effects  $\mathbf{u}$  which gives us the marginal model:

$$\mathbf{y} \sim \mathcal{N}(\mathbf{x}\beta, \sigma^2\mathbf{I} + \mathbf{Z}\mathbf{G}\mathbf{Z}^T),$$

We can now formalize an objective, the likelihood of the marginal model:

$$L(\beta, \mathbf{G}, \sigma^2) = P(\mathbf{y} \mid \beta, \mathbf{G}, \sigma^2)$$

For restricted maximum likelihood estimation we now treat  $\beta$  as random variable, too, e.g. as in an empirical Bayesian context with a flat prior, and marginalize it out:

$$L(\mathbf{G}, \sigma^2) = \int P(\mathbf{y} \mid \beta, \mathbf{G}, \sigma^2) d\beta$$

Estimation of parameters of the LMM is done in two steps: first we estimate  $\mathbf{G}$  and  $\sigma^2$  by maximizing the likelihood above numerically, for instance using a quasi-Newton method. Second we estimate  $\beta$  and  $\mathbf{u}$  using Henderson's mixed model equations analytically as:

$$\hat{\beta} = (\mathbf{x}^t \mathbf{V}^{-1} \mathbf{x})^{-1} \mathbf{x}^t \mathbf{V}^{-1} \mathbf{y}$$
$$\hat{\mathbf{u}} = \mathbf{R} \mathbf{U}^{-1} \mathbf{V}^{-1} (\mathbf{y} - \mathbf{x} \hat{\beta})$$

where  $\mathbf{V} = \mathbf{Z} \mathbf{R} \mathbf{Z}^T + \sigma^2 \mathbf{I}$ .

- [1] Bates D, Mächler M, Bolker BM, Walker SC. Fitting linear mixed-effects models using lme4. *Journal of Statistical Software*. 2015;67(1):1–48.
- [2] McCulloch CE, Searle SR. *Generalized, Linear, and Mixed Models*. Wiley Series in Probability and Statistics; 2001.
