# Supplementary material for: Host factor prioritization for pan-viral genetic perturbation screens using random intercept models and network propagation
Source: PubMed Central journal article supplement (PMC7034926; doi:10.1371/journal.pcbi.1007587), 2020-02-10

**S3 Figure. Pathogen-specific gene hits.** Every subplot shows the most significant genes for a virus using a false discovery rate threshold of 0.2. Using multiple testing correction on the pathogen-specific gene effects gives only a few significant genes all of which are viral dependency factors.

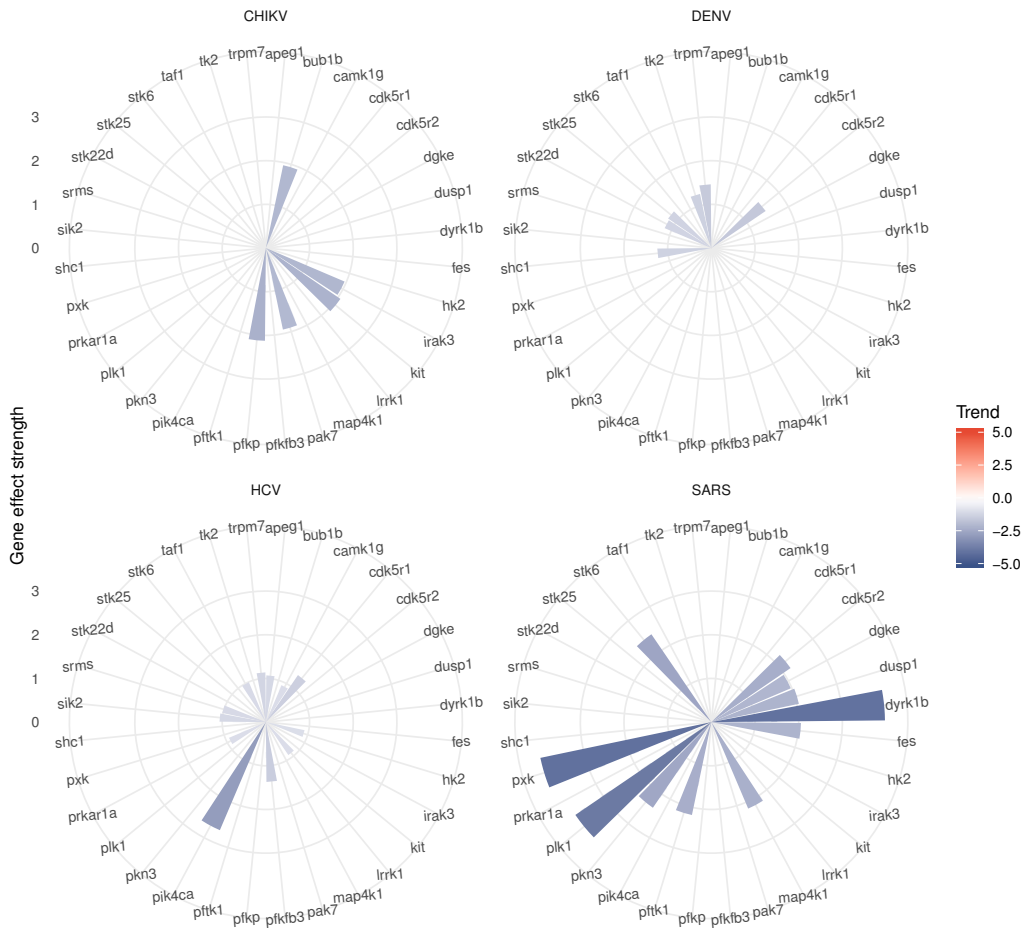

Supplement: pcbi.1007587.s011.pdf [file pcbi.1007587.s011.pdf]
