# Supplementary material for: Host factor prioritization for pan-viral genetic perturbation screens using random intercept models and network propagation
Source: PubMed Central journal article supplement (PMC7034926; doi:10.1371/journal.pcbi.1007587), 2020-02-10

**S4 Figure. Predictive performance on simulated and biological data.** The plots show the performance of our hierarchical model and PMM. (a) Our model shows a lower mean squared error for all error variances  $\sigma^2 = 1$ ,  $\sigma^2 = 2$  and  $\sigma^2 = 5$ . (b) Increasing the number of viruses lowers the mean squared errors in both models marginally. For all benchmarks our model had a minor, non-significant advantage over PMM.

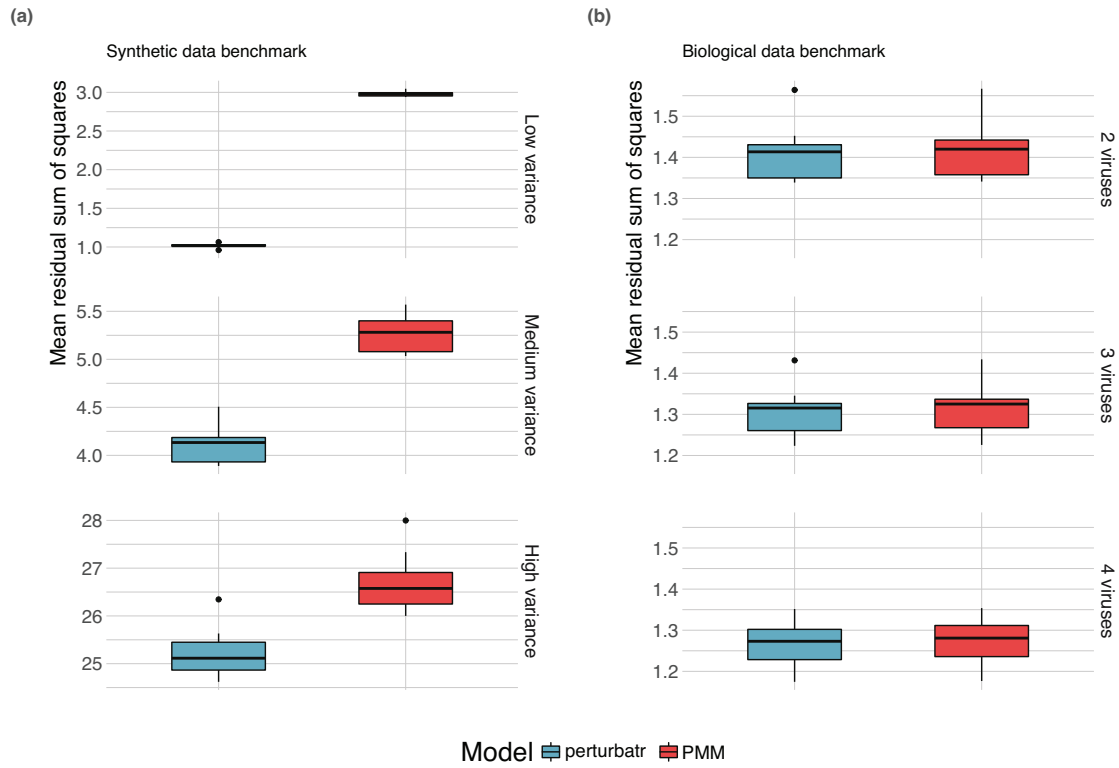

Supplement: pcbi.1007587.s012.pdf [file pcbi.1007587.s012.pdf]
