# Supplementary material for: Host factor prioritization for pan-viral genetic perturbation screens using random intercept models and network propagation
Source: PubMed Central journal article supplement (PMC7034926; doi:10.1371/journal.pcbi.1007587), 2020-02-10

**S5 Figure. Identification of host factors using a random effects model.** The 25 first hits identified using the first step of our model are shown when sorting the estimates by absolute effect sizes. The size of the bar determines the "pan-viral" effect a knockdown has on the entire group of pathogens. Knockdown of antiviral genes (in red) will generally increase pathogen viability, while pro-viral hits (in blue) will reduce it.

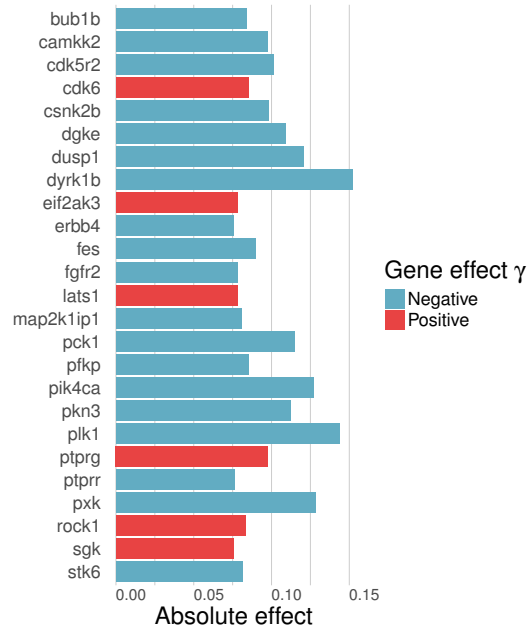

Supplement: pcbi.1007587.s013.pdf [file pcbi.1007587.s013.pdf]
